# Supplementary material for: Trans-generational impact of cerium oxide nanoparticles on tomato plants
Source: Royal Society of Chemistry journal article supplement (doi:10.1039/c3mt00033h), 2013-01-01
Supplement: c3mt00033h.pdf [file c3mt00033h.pdf]

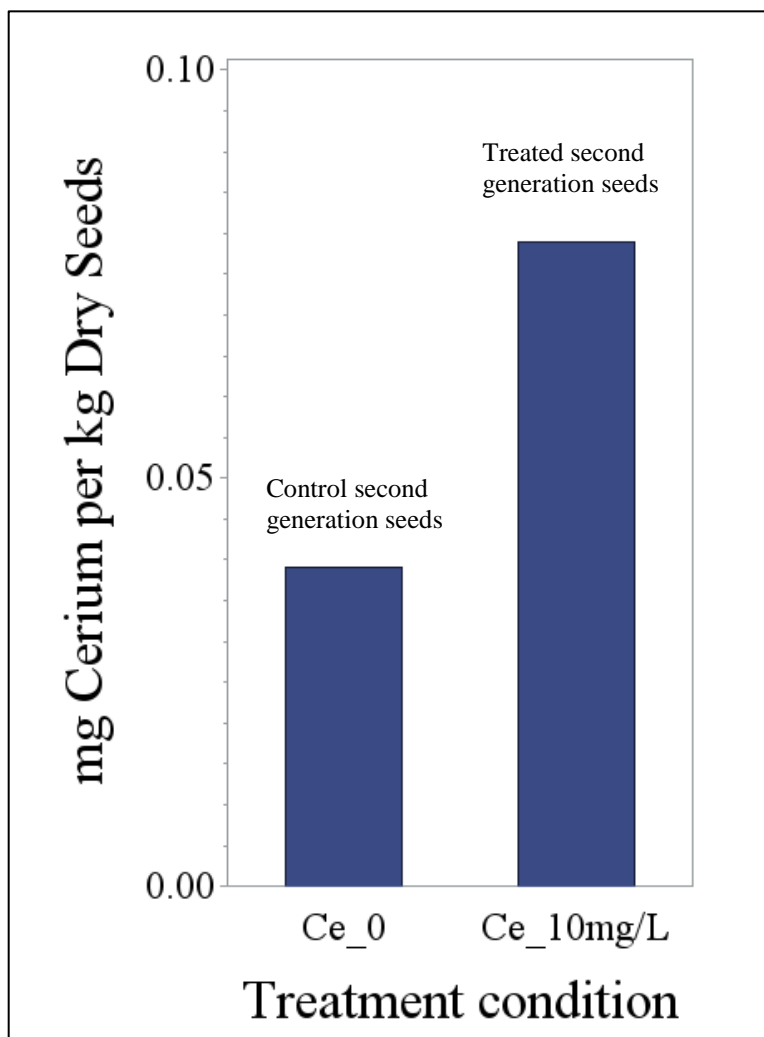

**Figure S1:** Cerium content in tomato seeds harvested from tomato plants irrigated with solutions containing different concentrations of cerium oxide nanoparticles throughout their lifecycle.

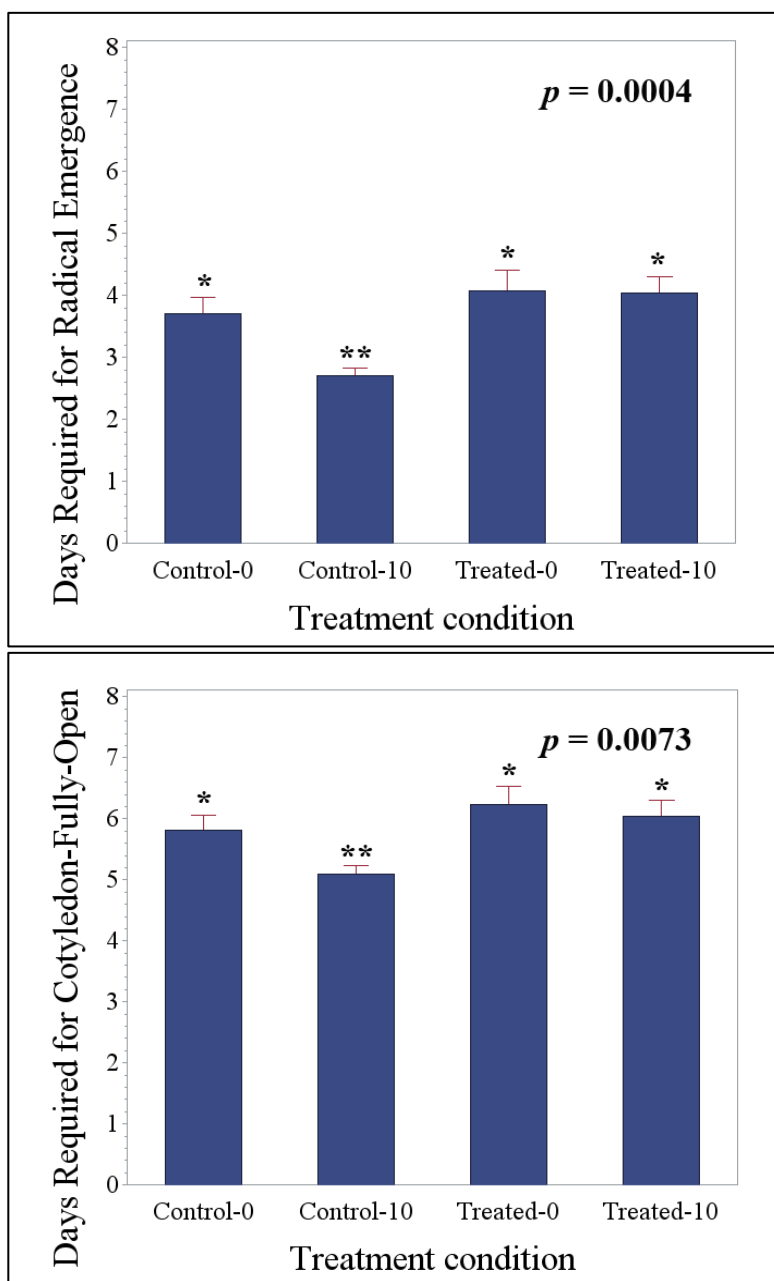

**Figure S2.** Days required for radicle emergence (Top) and full cotyledon expansion (Bottom) during seed germination. Error bars represent the standard error of the mean (n= 5). An asterisk denotes a mean significantly different from the other means ( $p < 0.05$ ).

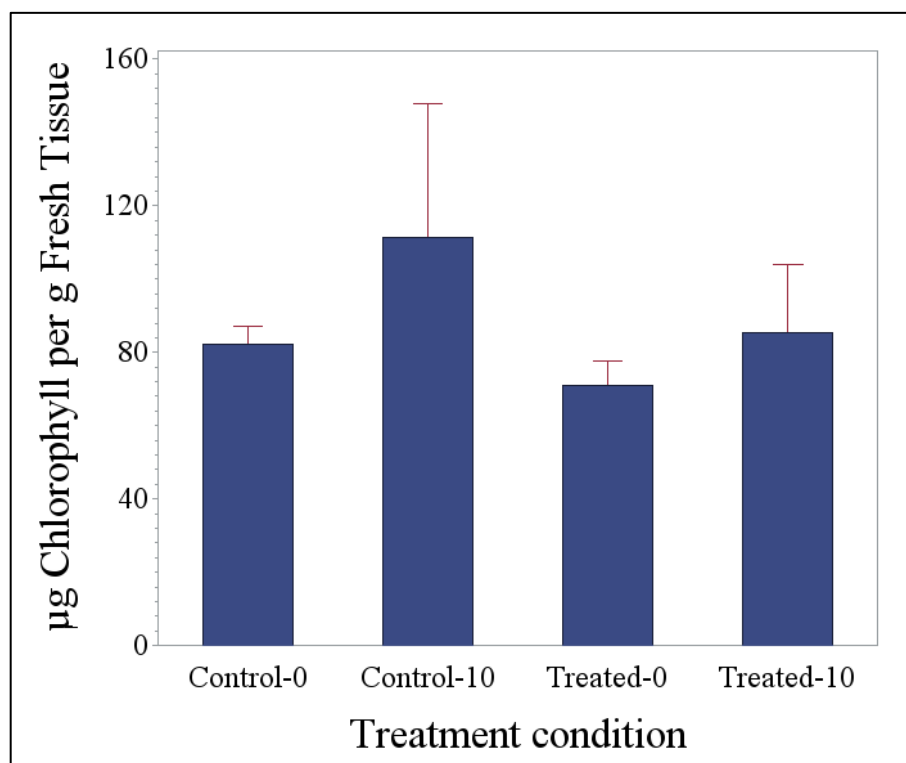

**Figure S3.** Chlorophyll content in leaf tissues of second generation seedlings. Error bars represent the standard error of the mean (n=3).

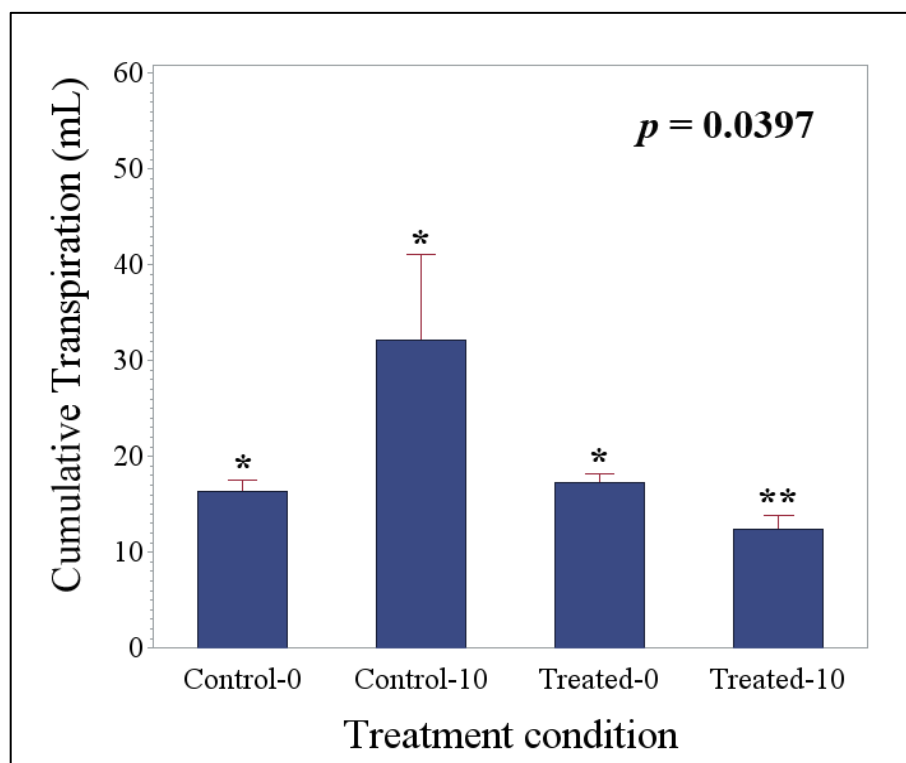

**Figure S4.** Cumulative water transpiration of second generation seedlings during the 10-day growth period with or without the presence of CeO<sub>2</sub>-NPs. Error bars represent the standard error of the mean (n= 5). Asterisks above bars demonstrate groupings of significant difference ( $p < 0.05$ ) after one-way ANOVA test.

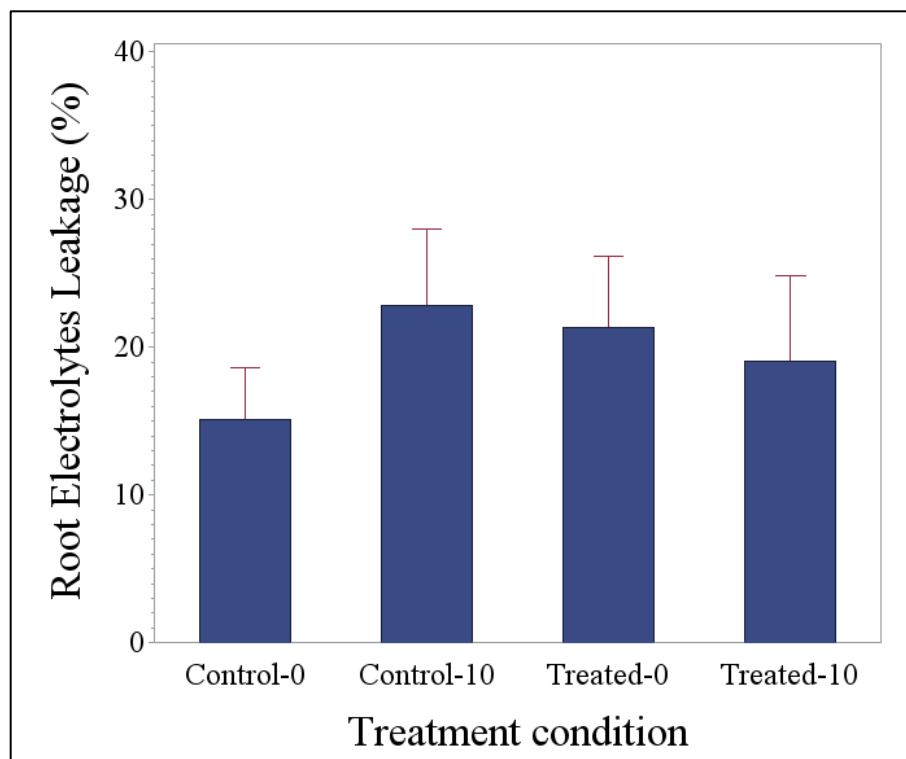

**Figure S5.** Root electrolyte leakage status of second generation seedlings originated from control and treated seeds growing with or without the CeO<sub>2</sub>-NPs. Error bars represent the standard error. n=5. No significant difference was detected.
